# Supplementary material for: Residents transitioning between hospital and care homes: protocol for codesigning a systems-level response to safety issues (SafeST study)
Source: HighWire-hosted journal article supplement (doi:10.1136/bmjopen-2021-050665), 2022-01-01
Supplement: bmjopen-2021-050665supp001_data_supplement.pdf [file bmjopen-2021-050665supp001_data_supplement.pdf]

## Supplementary material

### 1. Search string for Grey Literature

MedNAR and Open Grey

1. (("care home\*" OR "nursing home\*" OR "long term care\*" OR "residential\*") AND (("Medical Error\*" OR "Diagnostic Error\*" OR "Medication Error\*" OR "drug error\*" OR "Ob-server Variation" OR "Patient safety" OR incident OR incidents OR "adverse event\*" OR "near miss" OR "Risk Management" OR "Safety Management" OR Accident OR Accidents OR "Accident Prevention" OR Safety OR complication ) AND ("Data Collection" OR "medical record\*" OR "Health Record\*" OR "report\* system\*" OR "anonymous report\*" OR "non-anonymous report\*" OR "voluntary report\*" OR reporting)) ) OR ( ("care home\*" OR "nursing home\*" OR "long term care\*" OR "residential\*") AND (("Medical Error\*" OR "Diagnostic Error\*" OR "Medication Error\*" OR "drug error\*" OR "Ob-server Variation" OR "Patient safety" OR incident OR incidents OR "adverse event\*" OR "near miss" OR "Risk Management" OR "Safety Management" OR Accident OR Accidents OR "Accident Prevention" OR Safety OR complication) AND ("Data Collection" OR "medical record\*" OR "Health Record\*" OR "report\* system\*" OR "anonymous report\*" OR "non-anonymous report\*" OR "voluntary report\*" OR reporting)))

### 2. Search string for EBSCO (CINAHL, MEDLINE and PsycINFO)

- S1 "incident report\*" OR "error report\*" OR "incidents report\*" OR "errors report\*"  
 S2 "care home\*" OR "nursing home\*" OR "long term care\*" OR "residential\*"  
 S3 S1 AND S2  
 S4 ("Medical Error\*" OR "Diagnostic Error\*" OR "Medication Error\*" OR "drug error\*" OR "Observer Variation" OR "Patient safety" OR incident OR incidents OR "adverse event\*" OR "near miss" OR "Risk Management" OR "Safety Management" OR Accident OR Accidents OR "Accident Prevention" OR Safety OR complication) AND ("Data Collection" OR "medical record\*" OR "Health Record\*" OR "report\* system\*" OR "anonymous report\*" OR "non-anonymous report\*" OR "voluntary report\*" OR reporting)  
 S5 S2 AND S4  
 S6 S3 OR S5  
 S7 Limiters Year - 2000+  
 S8 Limiters Language - English

### 3. Search string for OVID (EMBASE 1996-2021, HMIC)

- S1 "incident report\*" OR "error report\*" OR "incidents report\*" OR "errors report\*"  
 S2 "care home\*" OR "nursing home\*" OR "long term care\*"  
 S3 residential\*  
 S4 S2 AND S3  
 S5 S1 AND S4  
 S6 "Medical Error\*" OR "Diagnostic Error\*" OR "Medication Error\*" OR "drug error\*" OR "Observer Variation" OR "Patient safety" OR incident OR incidents OR "adverse event\*" OR "near miss" OR "Risk Management" OR "Safety Management" OR Accident OR Accidents OR "Accident Prevention" OR Safety OR complication  
 S7 "Data Collection" OR "medical record\*" OR "Health Record\*" OR "report\* system\*" OR "anonymous report\*" OR "non-anonymous report\*" OR "voluntary report\*" OR reporting  
 S8 S6 AND S7  
 S9 S5 AND S8  
 S10 S5 OR S9  
 S11 Limiters – English Language  
 S12 Limiters – 2000 – 2021  
 S13 S10 AND S11 AND S12

### 4. Search string for ProQuest (ASSISA)

- S1 notf ("incident report\*" OR "error report\*" OR "incidents report\*" OR "errors report\*")

S2 noft ("care home\*" OR "nursing home\*" OR "long term care\*" OR "residential\*")  
 S3 S1 AND S2  
 S4 ("Medical Error\*" OR "Diagnostic Error\*" OR "Medication Error\*" OR "drug error\*" OR "Observer Variation" OR "Patient safety" OR incident OR incidents OR "adverse event\*" OR "near miss" OR "Risk Management" OR "Safety Management" OR "Accident" OR "Accidents" OR "Accident Prevention" OR "Safety" OR "complication\*") AND ("Data Collection" OR "medical record\*" OR "Health Record\*" OR "report\* system\*" OR "anonymous report\*" OR "non-anonymous report\*" OR "voluntary report\*" OR "reporting")  
 S5 S2 AND S4  
 S6 S3 OR S5  
 Limiter Exclude Pre 2000  
 Limiter English

### 5. Search string for Web of Science

S1 TS= ("incident\* report\*" OR "error\* report\*")  
 S2 TS= ("care home\*" OR "nursing home\*" OR "long term care\*" OR "residential\*")  
 S3 S1 AND S2  
 S4 TS= ("Medical Error\*" OR "Diagnostic Error\*" OR "Medication Error\*" OR "drug error\*" OR "Observer Variation" OR "Patient safety" OR incident OR incidents OR "adverse event\*" OR "near miss" OR "Risk Management" OR "Safety Management" OR "Accident" OR "Accidents" OR "Accident Prevention" OR "Safety" OR "complication\*") AND TS=("Data Collection" OR "medical record\*" OR "Health Record\*" OR "report\* system\*" OR "anonymous report\*" OR "non-anonymous report\*" OR "voluntary report\*" OR "reporting")  
 S5 S4 AND S2  
 S6 S5 OR S3  
 Limiter Exclude Pre 2000  
 Limiter English

### 6. Search string for Scopus

S1 TITLE-ABS-KEY ("incident report\*" OR "error report\*" OR "incidents report\*" OR "errors report\*")  
 S2 TITLE-ABS-KEY ("care home\*" OR "nursing home\*" OR "long term care\*" OR "residential\*")  
 S3 S1 AND S2  
 S4 TITLE-ABS-KEY ("Medical Error\*" OR "Diagnostic Error\*" OR "Medication Error\*" OR "drug error\*" OR "Observer Variation" OR "Patient safety" OR incident OR incidents OR "adverse event\*" OR "near miss" OR "Risk Management" OR "Safety Management" OR Accident OR Accidents OR "Accident Prevention" OR Safety OR complication) AND TITLE-ABS-KEY ("Data Collection" OR "medical record\*" OR "Health Record\*" OR "report\* system\*" OR "anonymous report\*" OR "non-anonymous report\*" OR "voluntary report\*" OR reporting)  
 S5 S2 AND S4  
 S6 S3 OR S5  
 Limiter Exclude Pre 2000  
 Limiter English
